# Supplementary material for: High Rate of Mutations of Adhesion Molecules and Extracellular Matrix Glycoproteins in Patients with Adult-Onset Focal and Segmental Glomerulosclerosis
Source: MDPI journal article supplement (doi:10.3390/biomedicines11061764), 2023-06-20
Supplement: s1 [file s1]

**High rate of mutations of adhesion molecules and extracellular matrix glycoproteins in patients with adult onset focal and segmental glomerulosclerosis**

**Sara Marcos González<sup>1</sup>, Emilio Rodrigo Calabia, Ignacio Varela, Michal Červienka, Javier Freire Salinas, and José Javier Gómez Román**

<sup>1</sup> Pathology Department. Marqués de Valdecilla University Hospital. Institute of Research Valdecilla (IDIVAL). Santander, Spain. sara.marcos@scsalud.es

**Supplemental Material Table of Contents**

DNA extraction protocol (Cobas® DNA Sample Preparation Kit) .....2

Table S1. Panel of 29 genes analyzed with next generation sequencing, and distinction between nephropathic and phenocopy genes..... 2

Table S2. Total variants, silent and non-silent mutations in FSGS patients ..... 5

Table S3. List of variants based on the UnifiedGenotyper and ACMG score ..... 6

Tabla S4. Frequency of variants annotated found in our study ..... 17

### *Section S1. DNA extraction protocol*

1. Vortex each tissue tube with TLB/PK for 30 seconds.
2. Incubate at 56°C for 1 hour.
3. Vortex the tube for 10 seconds.
4. Incubate at 90°C for 1 hour.
5. During this incubation, prepare the necessary number of filter tubes along with their waste tubes and label them with a sample ID on the filter cap. Additionally, label a 1.5 ml Eppendorf tube for each sample to collect the final extract.
6. Remove tubes from the 90°C heat block and let them cool for 5 minutes at room temperature.
7. Perform a 3-second centrifuge pulse.
8. Add 200 µl of DNA Paraffin Binding Buffer (DNA PBB) and homogenize by aspirating/dispensing 3 times.
9. Incubate at room temperature for 10 minutes.
10. Add 100 µl of isopropanol and homogenize.
11. Transfer all the liquid from the tube by pipetting to the filter assembly plus waste tube.
12. Centrifuge at 8000g (5400rpm) for 1 minute.
13. Remove and discard the waste tube and replace it with a new one.
14. Add 500 µl of Wash Buffer I to the filter assembly plus tube.
15. Centrifuge at 8000g for 1 minute.
16. Discard the liquid from the waste tube and keep the same filter tube.
17. Add 500 µl of Wash Buffer II to the filter assembly plus tube.
18. Centrifuge at 8000g for 1 minute.
19. Remove and discard the waste tube and replace it with a new one.
20. Centrifuge at 16000g for 1 minute.
21. Remove and discard the waste tube and place the filter tube in its labeled Eppendorf tube.
22. Add 50 µl of DNA Elution Buffer (DNA EB) to the center of the filter, without touching it.
23. Incubate at room temperature for 5 minutes.
24. Centrifuge at 8000g for 1 minute to collect the extracted DNA in the Eppendorf tube.
25. Discard the filter tube.

Table S1. Panel of 29 genes analyzed with next generation sequencing, and distinction between nephropathic and phenocopy genes

| <i>Gene</i>                                            | <i>Synonym</i>                                                  | <i>Chr.</i> | <i>OMIM</i> | <i>Nephropathy/ phenocopy Genes</i>          |
|--------------------------------------------------------|-----------------------------------------------------------------|-------------|-------------|----------------------------------------------|
| <b>ACTB</b><br>actin beta                              | BRWS1; PS1TP5BP1                                                | 7           | *102630     |                                              |
| <b>ARHGDIA</b><br>Rho GDP dissociation inhibitor alpha | GDIA1; NPHS8; RHOGDI; RHOGDI-1; HEL-S-47e                       | 17          | *601925     | Nephrotic syndrome, type 8 [1]               |
| <b>CDC42</b><br>Cell division cycle 42                 | TKS<br>G25K<br>CDC42Hs                                          | 1           | *116952     |                                              |
| <b>CDH1</b><br>Cadherin 1                              | UVO; CDHE; ECAD; LCAM; Arc-1; BCDS1; CD324                      | 16          | *192090     |                                              |
| <b>COL1A2</b><br>collagen type I alpha 2 chain         | OI4; EDSVCV; EDSARTH2                                           | 7           | *120160     |                                              |
| <b>ELN</b><br>Elastin                                  | WS; WBS; SVAS; ADCL1                                            | 7           | *130160     |                                              |
| <b>FN1</b><br>fibronectin 1                            | FN; CIG; FNZ; MSF; ED-B; FINC; GFND; LETS; GFND2; SMDCF         | 2           | *135600     | Glomerulopathy with fibronectin deposits [2] |
| <b>FSCN1</b><br>fascin actin-bundling protein 1        | HSN; SNL; p55; FAN1                                             | 7           | *602689     |                                              |
| <b>ICAM1</b><br>Intercellular adhesion molecule 1      | BB2<br>CD54<br>P3.58                                            | 19          | *147840     |                                              |
| <b>ITGA5</b><br>integrin subunit alpha 5               | FNRA; CD49e; <u>VLA-5</u> ; VLA5A                               | 12          | *135620     |                                              |
| <b>ITGB1</b><br>integrin subunit beta 1                | CD29; FNRB; MDF2; VLAB; GPIIA; MSK12; VLA-BETA                  | 10          | *135630     |                                              |
| <b>ITGB3</b><br>integrin subunit beta 3                | GT; CD61; GP3A; BDPLT2; GPIIIa; BDPLT16                         | 17          | *173470     |                                              |
| <b>LAMC1</b><br>laminin subunit gamma 1                | LAMININ B2, FORMERLY; LAMB2, FORMERLY                           | 1           | *150290     |                                              |
| <b>LPAR1</b><br>lysophosphatidic acid receptor 1       | EDG2; LPA1; VZG1; GPR26; edg-2; vzg-1; Gpcr26; Mrec1.3; rec.1.3 | 9           | *602282     |                                              |
| <b>LPAR2</b><br>lysophosphatidic acid receptor 2       | EDG4; LPA2; EDG-4; LPA-2                                        | 19          | *605110     |                                              |
| <b>LPAR3</b><br>lysophosphatidic acid receptor 3       | EDG7; GPCR; LPA3; Edg-7; LP-A3; HOFNH30; RP4-678I3              | 1           | *605106     |                                              |
| <b>LPAR4</b><br>lysophosphatidic acid receptor 4       | LPA4; P2Y9; GPR23; P2RY9; P2Y5-LIKE                             | X           | *300086     |                                              |
| <b>LPAR5</b><br>lysophosphatidic acid receptor 5       | GPR92, GPR93, KPG_010, LPA5                                     | 12          | *606926     |                                              |
| <b>LPAR6</b>                                           | ARWH1, HYPT8, LAH3,                                             | 13          | *609239     |                                              |

|                                                                        |                                                                      |    |         |                              |
|------------------------------------------------------------------------|----------------------------------------------------------------------|----|---------|------------------------------|
| lysophosphatidic acid receptor 6                                       | LPA-6, P2RY5, P2Y5                                                   |    |         |                              |
| <b>PTK2</b><br>protein tyrosine kinase 2                               | FAK; FADK; FAK1;<br>FRNK; PPP1R71;<br>p125FAK; pp125FAK              | 8  | *600758 |                              |
| <b>RHOA</b><br>Ras homolog family member A                             | ARHA; ARH12;<br>RHO12; EDFAOB;<br>RHOH12                             | 3  | *165390 |                              |
| <b>RHOC</b><br>Ras homolog family member C                             | H9<br>ARH9<br>ARHC<br>RHOH9                                          | 1  | *165380 |                              |
| <b>ROCK2</b><br>Rho associated coiled-coil containing protein kinase 2 | ROCK-II                                                              | 2  | *604002 |                              |
| <b>SELE</b><br>selectin E                                              | ELAM; ESEL; CD62E;<br>ELAM1; LECAM2                                  | 1  | *131210 | IgA nephropathy [3]          |
| <b>TNC</b><br>Tenascin C                                               | GP; JI; TN; HXB;<br>GMEM; TN-C;<br>DFNA56; 150-225                   | 9  | *187380 | Diverse glomerulopathies [4] |
| <b>TPM1</b><br>Tropomyosin 1                                           | CMH3;<br>TMSA;<br>CMD1Y; LVNC9;<br>C15orf13;<br>HEL-S-265; HTM-alpha | 15 | *191010 |                              |
| <b>TRAM1</b><br>Translocation associated membrane protein 1            | TRAM<br>PNAS8<br>TRAMP                                               | 8  | *605190 |                              |
| <b>VCAM1</b><br>vascular cell adhesion molecule 1                      | CD106; INCAM-100                                                     | 1  | *192225 |                              |
| <b>WASF3</b><br>WASP family member 3                                   | SCAR3<br>WAVE3<br>Brush-1                                            | 13 | *605068 |                              |

Table S2. Total variants, silent and non-silent mutations in FSGS patients

| Gene                  | Total variants | FSGS Non-Silent variants |
|-----------------------|----------------|--------------------------|
| <b><i>ACTB</i></b>    | 17             | 0                        |
| <b><i>ARHGDIA</i></b> | 2              | 0                        |
| <b><i>CDC42</i></b>   | 6              | 0                        |
| <b><i>CDH1</i></b>    | 23             | 10                       |
| <b><i>COL1A2</i></b>  | 23             | 21                       |
| <b><i>ELN</i></b>     | 20             | 18                       |
| <b><i>FN1</i></b>     | 23             | 23                       |
| <b><i>FSCN1</i></b>   | 9              | 0                        |
| <b><i>ICAM1</i></b>   | 19             | 17                       |
| <b><i>ITGA5</i></b>   | 23             | 0                        |
| <b><i>ITGB1</i></b>   | 23             | 3                        |
| <b><i>ITGB3</i></b>   | 18             | 18                       |
| <b><i>LAMC1</i></b>   | 21             | 20                       |
| <b><i>LPAR1</i></b>   | 11             | 0                        |
| <b><i>LPAR2</i></b>   | 23             | 0                        |
| <b><i>LPAR3</i></b>   | 5              | 5                        |
| <b><i>LPAR4</i></b>   | 9              | 9                        |
| <b><i>LPAR5</i></b>   | 0              | 0                        |
| <b><i>LPAR6</i></b>   | 11             | 10                       |
| <b><i>PTK2</i></b>    | 23             | 0                        |
| <b><i>RHOA</i></b>    | 0              | 0                        |
| <b><i>RHOC</i></b>    | 21             | 0                        |
| <b><i>ROCK2</i></b>   | 22             | 14                       |
| <b><i>SELE</i></b>    | 9              | 9                        |
| <b><i>TNC</i></b>     | 23             | 23                       |
| <b><i>TPM1</i></b>    | 23             | 0                        |
| <b><i>TRAM1</i></b>   | 23             | 0                        |
| <b><i>VCAM1</i></b>   | 23             | 2                        |
| <b><i>WASF3</i></b>   | 17             | 1                        |

Table S3. List of variants based on the UnifiedGenotyper and ACMG score

| Patient | Mutations | Non-silent mutations | Gene   | ID          | Nucleotide change | Amino acid change | Zygosity | Type of Mutation | Classify Variant<br>VarSome |
|---------|-----------|----------------------|--------|-------------|-------------------|-------------------|----------|------------------|-----------------------------|
| Case 1  | 87        | 19                   | TNC    | rs113301777 | c.3739 C>A        | p.Leu1247Ile      | Het      | Missense         | Benign                      |
|         |           |                      |        | rs1061494   | c.2039 A>G        | p.Gln680Arg       |          |                  |                             |
|         |           |                      |        | rs13321     | c.6022 G>C        | p.Glu2008Gln      | Hom      |                  |                             |
|         |           |                      |        | rs1757095   | c.1616 A>G        | p.Gln539Arg       |          |                  |                             |
|         |           |                      | ICAM1  | rs5498      | c.1405 A>G        | p.Lys469Glu       | Het      | Missense         | Benign                      |
|         |           |                      | ROCK2  | rs2230774   | c.1292 C>A        | p.Thr431Asn       | Het      | Missense         | Benign                      |
|         |           |                      | ITGB1  | -           | c.1807 A>T        | p.Asn603Tyr       | Het      | Missense         | VUS                         |
|         |           |                      | ITGB3  | rs15908     | c.1108 A>C        | p.Val370Leu       | Het      | Missense         | Benign                      |
|         |           |                      | LPAR4  | -           | c.260 T>C         | p.Leu87Pro        | Het      | Missense         | VUS                         |
|         |           |                      | ELN    | rs2071307   | c.1264 G>A        | p.Gly422Ser       | Het      | Missense         | Benign                      |
|         |           |                      | COL1A2 | rs42524     | c.1645 C>G        | p.Pro549Ala       | Hom      | Missense         | Benign                      |
|         |           |                      | LAMC1  | -           | c.148 T>C         | p.Cys50Arg        | Het      | Missense         | VUS                         |
|         |           |                      |        | rs20563     | c.1372 A>G        | p.Ile458Val       |          |                  | Benign                      |
|         |           |                      |        | rs20558     | c.2663 T>C        | p.Leu888Pro       |          |                  |                             |
|         |           |                      | CDH1   | -           | c.499 G>T         | p.Glu167*         | Het      | Nonsense         | Pathogenic                  |
|         |           |                      |        | -           | c.500 A>G         | p.Glu167Gly       |          | Missense         | Likely Benign               |
|         |           |                      | FN1    | rs1250209   | c.6415 G>A        | p.Val2139Ile      | Hom      | Missense         | Benign                      |
|         |           |                      |        | rs2577301   | c.2449 A>C        | p.Thr817Pro       |          |                  |                             |
|         |           |                      |        | rs1250259   | c.44 A>T          | p.Gln15Leu        |          |                  |                             |
| Case 2  | 103       | 20                   | TNC    | rs13321     | c.6022 G>C        | p.Glu2008Gln      | Hom      | Missense         | Benign                      |
|         |           |                      |        | rs1061494   | c.2039 A>G        | p.Gln680Arg       | Het      |                  |                             |
|         |           |                      |        | rs1757095   | c.1616 A>G        | p.Gln539Arg       | Hom      |                  |                             |
|         |           |                      | SELE   | rs5368      | c.1402 C>T        | p.His468Tyr       | Het      | Missense         | Benign                      |
|         |           |                      | ICAM1  | rs1799969   | c.721 G>A         | p.Gly241Arg       | Het      | Missense         | Benign                      |
|         |           |                      |        | rs5498      | c.1405 A>G        | p.Lys469Glu       |          |                  |                             |
|         |           |                      | ROCK2  | rs2230774   | c.1292 C>A        | p.Thr431Asn       | Het      | Missense         | Benign                      |
|         |           |                      | ITGB3  | rs15908     | c.1108 A>C        | p.Val370Leu       | Het      | Missense         | -                           |
|         |           |                      |        | rs121918449 | c.1199 G>A        | p.Cys400Tyr       |          |                  | Likely Pathogenic           |
|         |           |                      | LPAR4  | -           | c.260 T>C         | p.Leu87Pro        | Het      | Missense         | VUS                         |
|         |           |                      | ELN    | rs17855988  | c.1741 G>C        | p.Gly581Arg       | Het      | Missense         | Benign                      |
|         |           |                      | COL1A2 | -           | c.1015 A>C        | p.Thr339Pro       | Het      | Missense         | VUS                         |
|         |           |                      |        | rs42524     | c.1645 C>G        | p.Pro549Ala       | Hom      |                  | Benign                      |

|        |    |    |        |             |            |              |     |          |               |
|--------|----|----|--------|-------------|------------|--------------|-----|----------|---------------|
|        |    |    | LAMC1  | rs20563     | c.1372 A>G | p.Ile458Val  | Hom | Missense | Benign        |
|        |    |    |        | rs20558     | c.2663 T>C | p.Leu888Pro  |     |          |               |
|        |    |    | CDH1   | -           | c.499 G>T  | p.Glu167*    | Het | Nonsense | Pathogenic    |
|        |    |    |        | -           | c.500 A>G  | p.Glu167Gly  |     | Missense | Likely Benign |
|        |    |    | FN1    | rs1250209   | c.6415 G>A | p.Val2139Ile | Hom | Missense | Benign        |
|        |    |    |        | rs2577301   | c.2449 A>C | p.Thr817Pro  |     |          |               |
|        |    |    |        | rs1250259   | c.44 A>T   | p.Gln15Leu   |     |          |               |
| Case 3 | 91 | 18 | TNC    | rs13321     | c.6022 G>C | p.Glu2008Gln | Het | Missense | Benign        |
|        |    |    |        | rs2104772   | c.5029 A>T | p.Ile1677Leu |     |          |               |
|        |    |    |        | rs1061494   | c.2039 A>G | p.Gln680Arg  |     |          |               |
|        |    |    |        | rs1757095   | c.1616 A>G | p.Gln539Arg  | Hom |          |               |
|        |    |    | SELE   | rs5361      | c.445 A>C  | p.Ser149Arg  | Het | Missense | Benign        |
|        |    |    | ROCK2  | rs2230774   | c.1292 C>A | p.Thr431Asn  | Het | Missense | Benign        |
|        |    |    | ITGB3  | rs15908     | c.1108 A>C | p.Val370Leu  | Het | Missense | -             |
|        |    |    | LPAR3  | -           | c.524 C>G  | p.Ala175Gly  | Het | Missense | VUS           |
|        |    |    | LPAR4  | -           | c.260 T>C  | p.Leu87Pro   | Het | Missense | VUS           |
|        |    |    | ELN    | rs2071307   | c.1264 G>A | p.Gly422Ser  | Hom | Missense | Benign        |
|        |    |    |        | rs17855988  | c.1741 G>C | p.Gly581Arg  |     |          |               |
|        |    |    |        | rs41511151  | c.2078 G>A | p.Gly693Asp  | Het |          |               |
|        |    |    | COL1A2 | -           | c.1015 A>C | p.Thr339Pro  | Het | Missense | VUS           |
|        |    |    |        | rs42524     | c.1645 C>G | p.Pro549Ala  |     |          | Benign        |
|        |    |    | CDH1   | -           | c.500 A>G  | p.Glu167Gly  | Het | Missense | Likely Benign |
|        |    |    |        | rs1250209   | c.6415 G>A | p.Val2139Ile | Het | Missense | Benign        |
|        |    |    |        | rs2577301   | c.2449 A>C | p.Thr817Pro  | Hom |          |               |
|        |    |    |        | rs1250259   | c.44 A>T   | p.Gln15Leu   | Het |          |               |
| Case 4 | 86 | 16 | TNC    | rs13321     | c.6022 G>C | p.Glu2008Gln | Hom | Missense | Benign        |
|        |    |    |        | rs1757095   | c.1616 A>G | p.Gln539Arg  |     |          |               |
|        |    |    | ICAM1  | rs5498      | c.1405 A>G | p.Lys469Glu  | Hom | Missense | Benign        |
|        |    |    | ITGB3  | rs15908     | c.1108 A>C | p.Val370Leu  | Het | Missense | -             |
|        |    |    |        | rs367659742 | c.2351 C>T | p.Thr784Met  |     |          | VUS           |
|        |    |    | LPAR4  | rs148919808 | c.133 G>A  | p.Val45Ile   | Hom | Missense | Likely Benign |
|        |    |    |        | -           | c.260 T>C  | p.Leu87Pro   | Het |          | VUS           |
|        |    |    | ELN    | -           | c.1435 G>A | p.Val479Met  | Het | Missense | Likely Benign |
|        |    |    | COL1A2 | -           | c.1015 A>C | p.Thr339Pro  | Het | Missense | VUS           |
|        |    |    |        | rs42524     | c.1645 C>G | p.Pro549Ala  |     |          | Benign        |
|        |    |    | LAMC1  | rs20563     | c.1372 A>G | p.Ile458Val  | Het | Missense | Benign        |

|        |     |    |        |            |            |              |     |          |               |
|--------|-----|----|--------|------------|------------|--------------|-----|----------|---------------|
|        |     |    |        | rs20558    | c.2663 T>C | p.Leu888Pro  |     |          |               |
|        |     |    | CDH1   | -          | c.500 A>G  | p.Glu167Gly  | Het | Missense | Likely Benign |
|        |     |    | FN1    | rs1250209  | c.6415 G>A | p.Val2139Ile | Hom | Missense | Benign        |
|        |     |    |        | rs2577301  | c.2449 A>C | p.Thr817Pro  |     |          |               |
|        |     |    |        | rs1250259  | c.44 A>T   | p.Gln15Leu   |     |          |               |
| Case 5 | 105 | 20 | TNC    | rs13321    | c.6022 G>C | p.Glu2008Gln | Hom | Missense | Benign        |
|        |     |    |        | rs2104772  | c.5029 A>T | p.Ile1677Leu | Het |          |               |
|        |     |    |        | rs1061494  | c.2039 A>G | p.Gln680Arg  | Het |          |               |
|        |     |    |        | rs1757095  | c.1616 A>G | p.Gln539Arg  | Hom |          |               |
|        |     |    | ICAM1  | rs5498     | c.1405 A>G | p.Lys469Glu  | Het | Missense | Benign        |
|        |     |    | ITGB3  | rs15908    | c.1108 A>C | p.Val370Leu  | Het | Missense | -             |
|        |     |    | LPAR4  | -          | c.259 C>G  | p.Leu87Val   | Het | Missense | VUS           |
|        |     |    |        | -          | c.260 T>C  | p.Leu87Pro   |     |          |               |
|        |     |    | LPAR6  | -          | c.998 T>C  | p.Leu333Ser  | Het | Missense | VUS           |
|        |     |    | ELN    | -          | c.1435 G>A | p.Val479Met  | Het | Missense | Likely Benign |
|        |     |    |        | rs17855988 | c.1741 G>C | p.Gly581Arg  |     |          | Benign        |
|        |     |    | COL1A2 | -          | c.1015 A>C | p.Thr339Pro  | Het | Missense | VUS           |
|        |     |    |        | rs42524    | c.1645 C>G | p.Pro549Ala  | Hom |          | Benign        |
|        |     |    | LAMC1  | rs20563    | c.1372 A>G | p.Ile458Val  | Hom | Missense | Benign        |
|        |     |    |        | rs20558    | c.2663 T>C | p.Leu888Pro  |     |          |               |
|        |     |    | CDH1   | -          | c.499 G>T  | p.Glu167*    | Het | Nonsense | Pathologic    |
|        |     |    |        | -          | c.500 A>G  | p.Glu167Gly  |     | Missense | Likely Benign |
|        |     |    | FN1    | rs1250209  | c.6415 G>A | p.Val2139Ile | Het | Missense | Benign        |
|        |     |    |        | rs2577301  | c.2449 A>C | p.Thr817Pro  | Hom |          |               |
|        |     |    |        | rs1250259  | c.44 A>T   | p.Gln15Leu   | Het |          |               |
| Case 6 | 100 | 17 | TNC    | rs13321    | c.6022 G>C | p.Glu2008Gln | Hom | Missense | Benign        |
|        |     |    |        | rs2104772  | c.5029 A>T | p.Ile1677Leu | Het |          |               |
|        |     |    |        | rs1757095  | c.1616 A>G | p.Gln539Arg  | Hom |          |               |
|        |     |    | SELE   | rs5368     | c.1402 C>T | p.His468Tyr  | Het | Missense | Benign        |
|        |     |    | ICAM1  | rs5498     | c.1405 A>G | p.Lys469Glu  | Het | Missense | Benign        |
|        |     |    | ROCK2  | rs2230774  | c.1292 C>A | p.Thr431Asn  | Hom | Missense | Benign        |
|        |     |    | ITGB3  | rs15908    | c.1108 A>C | p.Val370Leu  | Het | Missense | -             |
|        |     |    | LPAR3  | -          | c.524 C>G  | p.Ala175Gly  | Het | Missense | VUS           |
|        |     |    | LPAR4  | -          | c.260 T>C  | p.Leu87Pro   | Het | Missense | VUS           |
|        |     |    | ELN    | rs2071307  | c.1264 G>A | p.Gly422Ser  | Het | Missense | Benign        |
|        |     |    |        | -          | c.1435 G>A | p.Val479Met  |     |          | Likely Benign |



|           |          |            |        |             |            |              |     |          |                   |
|-----------|----------|------------|--------|-------------|------------|--------------|-----|----------|-------------------|
|           |          |            | COL1A2 | rs42524     | c.1645 C>G | p.Pro549Ala  | Hom | Missense | Benign            |
|           |          |            | LAMC1  | rs20563     | c.1372 A>G | p.Ile458Val  | Hom | Missense | Benign            |
|           |          |            |        | rs20558     | c.2663 T>C | p.Leu888Pro  |     |          |                   |
|           |          |            | FN1    | rs1250209   | c.6415 G>A | p.Val2139Ile | Het | Missense | Benign            |
|           |          |            |        | rs2577301   | c.2449 A>C | p.Thr817Pro  | Hom |          |                   |
| rs1250259 | c.44 A>T | p.Gln15Leu |        | Het         |            |              |     |          |                   |
| Case 7    | 97       | 18         | TNC    | rs13321     | c.6022 G>C | p.Glu2008Gln | Hom | Missense | Benign            |
|           |          |            |        | rs113301777 | c.3739 C>A | p.Leu1247Ile | Het |          |                   |
|           |          |            |        | rs1061494   | c.2039 A>G | p.Gln680Arg  | Hom |          |                   |
|           |          |            |        | rs1757095   | c.1616 A>G | p.Gln539Arg  |     |          |                   |
|           |          |            | SELE   | rs5361      | c.445 A>C  | p.Ser149Arg  | Het | Missense | Benign            |
|           |          |            | ROCK2  | rs2230774   | c.1292 C>A | p.Thr431Asn  | Hom | Missense | Benign            |
|           |          |            | ITGB3  | rs15908     | c.1108 A>C | p.Val370Leu  | Hom | Missense | -                 |
|           |          |            |        | rs121918449 | c.1199 G>A | p.Cys400Tyr  | Het |          | Likely Pathogenic |
|           |          |            | LPAR3  | -           | c.524 C>G  | p.Ala175Gly  | Het | Missense | VUS               |
|           |          |            | ELN    | rs2071307   | c.1264 G>A | p.Gly422Ser  | Hom | Missense | Benign            |
|           |          |            |        | -           | c.1435 G>A | p.Val479Met  | Het |          | Likely Benign     |
|           |          |            | COL1A2 | rs42524     | c.1645 C>G | p.Pro549Ala  | Hom | Missense | Benign            |
|           |          |            | LAMC1  | rs34995260  | c.3796 G>A | p.Glu1266Lys | Het | Missense | Likely Benign     |
|           |          |            | CDH1   | -           | c.499 G>T  | p.Glu167*    | Het | Nonsense | Pathogenic        |
|           |          |            |        | -           | c.500 A>G  | p.Glu167Gly  |     | Missense | Likely Benign     |
|           |          |            | FN1    | rs1250209   | c.6415 G>A | p.Val2139Ile | Het | Missense | Benign            |
|           |          |            |        | rs2577301   | c.2449 A>C | p.Thr817Pro  | Hom |          |                   |
|           |          |            |        | rs1250259   | c.44 A>T   | p.Gln15Leu   |     |          |                   |
| Case 8    | 84       | 13         | TNC    | rs13321     | c.6022 G>C | p.Glu2008Gln | Hom | Missense | Benign            |
|           |          |            |        | rs2104772   | c.5029 A>T | p.Ile1677Leu | Het |          |                   |
|           |          |            |        | rs1138545   | c.3197 G>A | p.Arg1066His |     |          |                   |
|           |          |            |        | rs1757095   | c.1616 A>G | p.Gln539Arg  | Hom |          |                   |
|           |          |            | ICAM1  | rs5498      | c.1405 A>G | p.Lys469Glu  | Het | Missense | Benign            |
|           |          |            | ITGB3  | rs15908     | c.1108 A>C | p.Val370Leu  | Hom | Missense | -                 |
|           |          |            | COL1A2 | rs42524     | c.1645 C>G | p.Pro549Ala  | Het | Missense | Benign            |
|           |          |            | LAMC1  | rs20563     | c.1372 A>G | p.Ile458Val  | Het | Missense | Benign            |
|           |          |            |        | rs20558     | c.2663 T>C | p. Leu888Pro |     |          |                   |
|           |          |            | CDH1   | -           | c.500 A>G  | p.Glu167Gly  | Het | Missense | Likely Benign     |
|           |          |            | FN1    | rs1250209   | c.6415 G>A | p.Val2139Ile | Het | Missense | Benign            |
|           |          |            |        | rs2577301   | c.2449 A>C | p.Thr817Pro  | Hom |          |                   |

|         |           |            |              |            |            |              |     |          |               |
|---------|-----------|------------|--------------|------------|------------|--------------|-----|----------|---------------|
|         |           |            |              | rs1250259  | c.44 A>T   | p.Gln15Leu   |     |          |               |
| Case 9  | 97        | 17         | TNC          | rs13321    | c.6022 G>C | p.Glu2008Gln | Hom | Missense | Benign        |
|         |           |            |              | rs1061494  | c.2039 A>G | p.Gln680Arg  | Het |          |               |
|         |           |            |              | rs1757095  | c.1616 A>G | p.Gln539Arg  | Hom |          |               |
|         |           |            | ROCK2        | rs2230774  | c.1292 C>A | p.Thr431Asn  | Het | Missense | Benign        |
|         |           |            | ITGB3        | rs5918     | c.176 T>C  | p.Leu59Pro   | Het | Missense | Benign        |
|         |           |            |              | rs15908    | c.1108 A>C | p.Val370Leu  |     |          | -             |
|         |           |            | LPAR4        | -          | c.260 T>C  | p.Leu87Pro   | Het | Missense | VUS           |
|         |           |            | LPAR6        | -          | c.227 A>T  | p.Tyr76Phe   | Het | Missense | VUS           |
|         |           |            | COL1A2       | -          | c.1015 A>C | p.Thr339Pro  | Het | Missense | VUS           |
|         |           |            |              | rs42524    | c.1645 C>G | p.Pro549Ala  |     |          | Benign        |
|         |           |            | LAMC1        | rs20563    | c.1372 A>G | p.Ile458Val  | Het | Missense | Benign        |
|         |           |            |              | rs20558    | c.2663 T>C | p. Leu888Pro |     |          |               |
|         |           |            | CDH1         | -          | c.499 G>T  | p.Glu167*    | Het | Nonsense | Pathogenic    |
|         |           |            |              | -          | c.500 A>G  | p.Glu167Gly  |     | Missense | Likely Benign |
| FN1     | rs1250209 | c.6415 G>A | p.Val2139Ile | Het        | Missense   | Benign       |     |          |               |
|         | rs2577301 | c.2449 A>C | p.Thr817Pro  | Hom        |            |              |     |          |               |
|         | rs1250259 | c.44 A>T   | p.Gln15Leu   |            |            |              |     |          |               |
| Case 10 | 98        | 22         | TNC          | rs13321    | c.6022 G>C | p.Glu2008Gln | Hom | Missense | Benign        |
|         |           |            |              | rs2274750  | c.5341 G>A | p.Ala1781Thr | Het |          |               |
|         |           |            |              | rs2104772  | c.5029 A>T | p.Ile1677Leu |     |          |               |
|         |           |            |              | rs1061494  | c.2039 A>G | p.Gln680Arg  | Hom |          |               |
|         |           |            |              | rs1757095  | c.1616 A>G | p.Gln539Arg  |     |          |               |
|         |           |            | ICAM1        | rs5498     | c.1405 A>G | p.Lys469Glu  | Het | Missense | Benign        |
|         |           |            | ITGB1        | -          | c.1807 A>T | p.Asn603Tyr  | Het | Missense | VUS           |
|         |           |            | LPAR3        | -          | c.524 C>G  | p.Ala175Gly  | Het | Missense | VUS           |
|         |           |            | LPAR4        | -          | c.259 C>G  | p.Leu87Val   | Het | Missense | VUS           |
|         |           |            |              | -          | c.260 T>C  | p.Leu87Pro   |     |          |               |
|         |           |            | LPAR6        | -          | c.227 A>T  | p.Tyr76Phe   | Het | Missense | VUS           |
|         |           |            | ELN          | rs2071307  | c.1264 G>A | p.Gly422Ser  | Het | Missense | Benign        |
|         |           |            |              | -          | c.1435 G>A | p.Val479Met  |     |          | Likely Benign |
|         |           |            | COL1A2       | -          | c.1015 A>C | p.T339Pro    | Het | Missense | VUS           |
|         |           |            |              | rs42524    | c.1645 C>G | p.Pro549Ala  | Hom |          | Benign        |
|         |           |            | LAMC1        | rs20563    | c.1372 A>G | p.Ile458Val  | Hom | Missense | Benign        |
|         |           |            |              | rs20558    | c.2663 T>C | p. Leu888Pro |     |          |               |
|         |           |            |              | rs61749262 | c.3614 A>G | p.Asn1205Ser | Het |          |               |

|         |    |    |               |             |            |              |            |          |               |
|---------|----|----|---------------|-------------|------------|--------------|------------|----------|---------------|
|         |    |    | <i>CDH1</i>   | -           | c.500 A>G  | p.Glu167Gly  | <i>Het</i> | Missense | Likely Benign |
|         |    |    | <i>FN1</i>    | rs1250209   | c.6415 G>A | p.Val2139Ile | <i>Hom</i> | Missense | Benign        |
|         |    |    |               | rs2577301   | c.2449 A>C | p.Thr817Pro  |            |          |               |
|         |    |    |               | rs1250259   | c.44 A>T   | p.Gln15Leu   |            |          |               |
| Case 11 | 95 | 18 | <i>TNC</i>    | rs1061494   | c.2039 A>G | p.Gln680Arg  | <i>Het</i> | Missense | Benign        |
|         |    |    |               | rs1757095   | c.1616 A>G | p.Gln539Arg  | <i>Hom</i> |          |               |
|         |    |    | <i>SELE</i>   | rs5361      | c.445 A>C  | p.Ser149Arg  | <i>Het</i> | Missense | Benign        |
|         |    |    | <i>ICAM1</i>  | rs5498      | c.1405 A>G | p.Lys469Glu  | <i>Hom</i> | Missense | Benign        |
|         |    |    |               | rs376526495 | c.1589 C>T | p.Thr530Met  | <i>Het</i> |          | Likely Benign |
|         |    |    | <i>ROCK2</i>  | rs2230774   | c.1292 C>A | p.Thr431Asn  | <i>Hom</i> | Missense | Benign        |
|         |    |    | <i>ITGB3</i>  | rs15908     | c.1108 A>C | p.Val370Leu  | <i>Hom</i> | Missense | -             |
|         |    |    | <i>LPAR3</i>  | -           | c.524 C>G  | p.Ala175Gly  | <i>Het</i> | Missense | VUS           |
|         |    |    | <i>LPAR4</i>  | -           | c.259 C>G  | p.Leu87Val   | <i>Het</i> | Missense | VUS           |
|         |    |    |               | -           | c.260 T>C  | p.Leu87Pro   |            |          |               |
|         |    |    | <i>ELN</i>    | rs2071307   | c.1264 G>A | p.Gly422Ser  | <i>Hom</i> | Missense | Benign        |
|         |    |    |               | -           | c.1435 G>A | p.Val479Met  | <i>Het</i> |          | Likely Benign |
|         |    |    |               | rs17855988  | c.1741 G>C | p.Gly581Arg  |            |          | Benign        |
|         |    |    | <i>LAMC1</i>  | rs20563     | c.1372 A>G | p.Ile458Val  | <i>Hom</i> | Missense | Benign        |
|         |    |    |               | rs20558     | c.2663 T>C | p. Leu888Pro |            |          |               |
|         |    |    | <i>FN1</i>    | rs1250209   | c.6415 G>A | p.Val2139Ile | <i>Het</i> | Missense | Benign        |
|         |    |    |               | rs2577301   | c.2449 A>C | p.Thr817Pro  | <i>Hom</i> |          |               |
|         |    |    |               | rs1250259   | c.44 A>T   | p.Gln15Leu   |            |          |               |
| Case 12 | 97 | 15 | <i>TNC</i>    | rs13321     | c.6022 G>C | p.Glu2008Gln | <i>Het</i> | Missense | Benign        |
|         |    |    |               | rs2104772   | c.5029 A>T | p.Ile1677Leu |            |          |               |
|         |    |    |               | rs1138545   | c.3197 G>A | p.Arg1066His |            |          |               |
|         |    |    |               | rs1061494   | c.2039 A>G | p.Gln680Arg  |            |          |               |
|         |    |    |               | rs1757095   | c.1616 A>G | p.Gln539Arg  | <i>Hom</i> |          |               |
|         |    |    | <i>ROCK2</i>  | rs2230774   | c.1292 C>A | p.Thr431Asn  | <i>Het</i> | Missense | Benign        |
|         |    |    | <i>ITGB3</i>  | rs15908     | c.1108 A>C | p.V370L      | <i>Het</i> | Missense | -             |
|         |    |    | <i>LPAR6</i>  | -           | c.227 A>T  | p.Y76F       | <i>Het</i> | Missense | VUS           |
|         |    |    | <i>ELN</i>    | rs2071307   | c.1264 G>A | p.Gly422Ser  | <i>Het</i> | Missense | Benign        |
|         |    |    | <i>COL1A2</i> | rs42524     | c.1645 C>G | p.Pro549Ala  | <i>Hom</i> | Missense | Benign        |
|         |    |    | <i>LAMC1</i>  | rs20563     | c.1372 A>G | p.Ile458Val  | <i>Het</i> | Missense | Benign        |
|         |    |    |               | rs20558     | c.2663 T>C | p. Leu888Pro |            |          |               |
|         |    |    | <i>FN1</i>    | rs1250209   | c.6415 G>A | p.V2139I     | <i>Hom</i> | Missense | Benign        |
|         |    |    |               | rs2577301   | c.2449 A>C | p.Thr817Pro  |            |          |               |

|         |    |    |           |             |                 |              |     |                  |        |
|---------|----|----|-----------|-------------|-----------------|--------------|-----|------------------|--------|
|         |    |    |           | rs1250259   | c.44 A>T        | p.Gln15Leu   |     |                  |        |
| Case 13 | 93 | 18 | TNC       | -           | Exon 28 - 2 A>T | -            | Het | Essential splice | -      |
|         |    |    |           | rs13321     | c.6022 G>C      | p.Glu2008Gln | Hom | Missense         | Benign |
|         |    |    |           | rs2104772   | c.5029 A>T      | p.Ile1677Leu | Het |                  |        |
|         |    |    |           | rs1061494   | c.2039 A>G      | p.Gln680Arg  | Hom |                  |        |
|         |    |    |           | rs1757095   | c.1616 A>G      | p.Gln539Arg  | Het |                  |        |
|         |    |    | ICAM1     | rs1801714   | c.1055 C>T      | p.Pro352Leu  | Het | Missense         | Benign |
|         |    |    |           | rs5498      | c.1405 A>G      | p.Lys469Glu  |     |                  |        |
|         |    |    | ROCK2     | rs2230774   | c.1292 C>A      | p.Thr431Asn  | Het | Missense         | Benign |
|         |    |    | ELN       | rs2071307   | c.1264 G>A      | p.Gly422Ser  | Het | Missense         | Benign |
|         |    |    |           | rs17855988  | c.1741 G>C      | p.Gly581Arg  |     |                  |        |
|         |    |    | COL1A2    | -           | c.1015 A>C      | p.Thr339Pro  | Het | Missense         | VUS    |
|         |    |    |           | rs42524     | c.1645 C>G      | p.Pro549Ala  | Hom |                  | Benign |
|         |    |    | LAMC1     | rs20563     | c.1372 A>G      | p.Ile458Val  | Het | Missense         | Benign |
|         |    |    |           | rs20558     | c.2663 T>C      | p.Leu888Pro  |     |                  |        |
|         |    |    |           | rs61749262  | c.3614 A>G      | p.Asn1205Ser |     |                  |        |
|         |    |    | FN1       | rs1250209   | c.6415 G>A      | p.Val2139Ile | Hom | Missense         | Benign |
|         |    |    |           | rs2577301   | c.2449 A>C      | p.Thr817Pro  |     |                  |        |
|         |    |    |           | rs1250259   | c.44 A>T        | p.Gln15Leu   |     |                  |        |
| Case 14 | 86 | 20 | TNC       | rs13321     | c.6022 G>C      | p.Glu2008Gln | Hom | Missense         | Benign |
|         |    |    |           | rs2104772   | c.5029 A>T      | p.Ile1677Leu | Het |                  |        |
|         |    |    |           | rs113301777 | c.3739 C>A      | p.Leu1247Ile |     |                  |        |
|         |    |    |           | rs1138545   | c.3197 G>A      | p.Arg1066His |     |                  |        |
|         |    |    |           | rs1061494   | c.2039 A>G      | p.Gln680Arg  |     |                  |        |
|         |    |    | rs1757095 | c.1616 A>G  | p.Gln539Arg     |              |     |                  |        |
|         |    |    | SELE      | rs5368      | c.1402 C>T      | p.His468Tyr  | Het | Missense         | Benign |
|         |    |    | ICAM1     | rs1801714   | c.1055 C>T      | p.Pro352Leu  | Het | Missense         | Benign |
|         |    |    |           | rs5498      | c.1405 A>G      | p.Lys469Glu  |     |                  |        |
|         |    |    | ROCK2     | rs2230774   | c.1292 C>A      | p.Thr431Asn  | Het | Missense         | Benign |
|         |    |    | ITGB3     | rs5918      | c.176 T>C       | p.Leu59Pro   | Het | Missense         | Benign |
|         |    |    |           | rs15908     | c.1108 A>C      | p.Val370Leu  |     |                  | -      |
|         |    |    | LPAR6     | -           | c.227 A>T       | p.Tyr76Phe   | Het | Missense         | VUS    |
|         |    |    | ELN       | rs2071307   | c.1264 G>A      | p.Gly422Ser  | Hom | Missense         | Benign |
|         |    |    | COL1A2    | rs42524     | c.1645 C>G      | p.Pro549Ala  | Het | Missense         | Benign |
|         |    |    | LAMC1     | rs20563     | c.1372 A>G      | p.Ile458Val  | Het | Missense         | Benign |
|         |    |    |           | rs20558     | c.2663 T>C      | p. Leu888Pro |     |                  |        |

|         |     |    |        |            |            |              |     |          |               |
|---------|-----|----|--------|------------|------------|--------------|-----|----------|---------------|
|         |     |    | FN1    | rs1250209  | c.6415 G>A | p.Val2139Ile | Het | Missense | Benign        |
|         |     |    |        | rs2577301  | c.2449 A>C | p.Thr817Pro  | Hom |          |               |
|         |     |    |        | rs1250259  | c.44 A>T   | p.Gln15Leu   |     |          |               |
| Case 15 | 84  | 9  | TNC    | rs13321    | c.6022 G>C | p.Glu2008Gln | Hom | Missense | Benign        |
|         |     |    |        | rs1061494  | c.2039 A>G | p.Gln680Arg  |     |          |               |
|         |     |    |        | rs1757095  | c.1616 A>G | p.Gln539Arg  |     |          |               |
|         |     |    | SELE   | rs5361     | c.445 A>C  | p.Ser149Arg  | Het | Missense | Benign        |
|         |     |    | ITGB3  | rs15908    | c.1108 A>C | p.Val370Leu  | Het | Missense | -             |
|         |     |    | ELN    | rs2071307  | c.1264 G>A | p.Gly422Ser  | Het | Missense | Benign        |
|         |     |    | COL1A2 | rs42524    | c.1645 C>G | p.Pro549Ala  | Hom | Missense | Benign        |
|         |     |    | FN1    | rs1250209  | c.6415 G>A | p.Val2139Ile | Het | Missense | Benign        |
|         |     |    |        | rs2577301  | c.2449 A>C | p.Thr817Pro  | Hom |          |               |
| Case 16 | 90  | 13 | TNC    | rs13321    | c.6022 G>C | p.Glu2008Gln | Hom | Missense | Benign        |
|         |     |    |        | rs1061494  | c.2039 A>G | p.Gln680Arg  |     |          |               |
|         |     |    |        | rs1757095  | c.1616 A>G | p.Gln539Arg  |     |          |               |
|         |     |    | ICAM1  | rs5498     | c.1405 A>G | p.Lys469Glu  | Het | Missense | Benign        |
|         |     |    | ROCK2  | rs2230774  | c.1292 C>A | p.Thr431Asn  | Het | Missense | Benign        |
|         |     |    | LPAR6  | -          | c.998 T>C  | p.Leu333Ser  | Het | Missense | VUS           |
|         |     |    | ELN    | -          | c.1435 G>A | p.Val479Met  | Het | Missense | Likely Benign |
|         |     |    |        | rs17855988 | c.1741 G>C | p.Gly581Arg  |     |          | Benign        |
|         |     |    | LAMC1  | rs20563    | c.1372 A>G | p.Ile458Val  | Het | Missense | Benign        |
|         |     |    |        | rs20558    | c.2663 T>C | p. Leu888Pro |     |          |               |
|         |     |    | FN1    | rs1250209  | c.6415 G>A | p.Val2139Ile | Het | Missense | Benign        |
|         |     |    |        | rs2577301  | c.2449 A>C | p.Thr817Pro  | Hom |          |               |
|         |     |    |        | rs1250259  | c.44 A>T   | p.Gln15Leu   |     |          |               |
| Case 17 | 106 | 17 | TNC    | rs13321    | c.6022 G>C | p.Glu2008Gln | Hom | Missense | Benign        |
|         |     |    |        | rs2104772  | c.5029 A>T | p.Ile1677Leu | Het |          | Likely Benign |
|         |     |    |        | -          | c.4241 G>C | p.Arg1414Thr |     |          | Benign        |
|         |     |    |        | rs1138545  | c.3197 G>A | p.Arg1066His |     |          |               |
|         |     |    |        | rs1757095  | c.1616 A>G | p.Gln539Arg  | Hom |          |               |
|         |     |    | SELE   | rs5368     | c.1402 C>T | p.His468Tyr  | Hom | Missense | Benign        |
|         |     |    | ICAM1  | rs5498     | c.1405 A>G | p.Lys469Glu  | Het | Missense | Benign        |
|         |     |    | ROCK2  | rs2230774  | c.1292 C>A | p.Thr431Asn  | Het | Missense | Benign        |
|         |     |    | ITGB3  | rs5918     | c.176 T>C  | p.Leu59Pro   | Het | Missense | Likely Benign |
|         |     |    |        | rs15908    | c.1108 A>C | p.Val370Leu  |     |          | -             |
|         |     |    | COL1A2 | -          | c.1015 A>C | p.Thr339Pro  | Het | Missense | VUS           |

|  |  |  |       |             |            |              |     |          |               |
|--|--|--|-------|-------------|------------|--------------|-----|----------|---------------|
|  |  |  | LAMC1 | rs42524     | c.1645 C>G | p.Pro549Ala  |     | Missense | Benign        |
|  |  |  |       | rs20563     | c.1372 A>G | p.Ile458Val  | Hom |          | Benign        |
|  |  |  |       | rs148690613 | c.2053 A>G | p.Thr685Ala  | Het |          | Likely Benign |
|  |  |  |       | rs20558     | c.2663 T>C | p. Leu888Pro | Hom |          | Benign        |
|  |  |  | FN1   | rs1250209   | c.6415 G>A | p.Val2139Ile | Het | Missense | Benign        |
|  |  |  |       | rs2577301   | c.2449 A>C | p.Thr817Pro  | Hom |          |               |

|         |    |    |        |            |            |              |     |          |        |
|---------|----|----|--------|------------|------------|--------------|-----|----------|--------|
| Case 18 | 99 | 14 | TNC    | rs13321    | c.6022 G>C | p.Glu2008Gln | Hom | Missense | Benign |
|         |    |    |        | rs2104772  | c.5029 A>T | p.Ile1677Leu |     |          |        |
|         |    |    |        | rs1757095  | c.1616 A>G | p.Gln539Arg  |     |          |        |
|         |    |    | ITGB3  | rs5918     | c.176 T>C  | p.Leu59Pro   | Het | Missense | Benign |
|         |    |    |        | rs15908    | c.1108 A>C | p.Val370Leu  | Hom |          | -      |
|         |    |    | LPAR6  | -          | c.227 A>T  | p.Tyr76Phe   | Het | Missense | VUS    |
|         |    |    | ELN    | rs2071307  | c.1264 G>A | p.Gly422Ser  | Hom | Missense | Benign |
|         |    |    |        | rs17855988 | c.1741 G>C | p.Gly581Arg  | Het |          |        |
|         |    |    | COL1A2 | rs42524    | c.1645 C>G | p.Pro549Ala  | Het | Missense | Benign |
|         |    |    | LAMC1  | rs20563    | c.1372 A>G | p.Ile458Val  | Het | Missense | Benign |
|         |    |    |        | rs20558    | c.2663 T>C | p. Leu888Pro |     |          |        |
|         |    |    | FN1    | rs1250209  | c.6415 G>A | p.Val2139Ile | Het | Missense | Benign |
|         |    |    |        | rs2577301  | c.2449 A>C | p.Thr817Pro  | Hom |          |        |
|         |    |    |        | rs1250259  | c.44 A>T   | p.Gln15Leu   |     |          |        |

|         |     |    |        |             |            |              |     |          |        |
|---------|-----|----|--------|-------------|------------|--------------|-----|----------|--------|
| Case 19 | 101 | 17 | TNC    | rs13321     | c.6022 G>C | p.Glu2008Gln | Het | Missense | Benign |
|         |     |    |        | rs61734387  | c.5093 G>C | p.Arg1698Pro |     |          | Benign |
|         |     |    |        | rs113301777 | c.3739 C>A | p.Leu1247Ile |     |          | Benign |
|         |     |    |        | rs1061494   | c.2039 A>G | p.Gln680Arg  |     |          |        |
|         |     |    |        | rs1757095   | c.1616 A>G | p.Gln539Arg  |     |          |        |
|         |     |    | WASF3  | -           | c.934 G>C  | p.Ala312Pro  | Het | Missense | VUS    |
|         |     |    | ICAM1  | rs5498      | c.1405 A>G | p.Lys469Glu  | Het | Missense | Benign |
|         |     |    | ROCK2  | rs2230774   | c.1292 C>A | p.Thr431Asn  | Het | Missense | Benign |
|         |     |    | ITGB3  | rs5918      | c.176 T>C  | p.Leu59Pro   | Het | Missense | Benign |
|         |     |    |        | rs15908     | c.1108 A>C | p.Val370Leu  |     |          | -      |
|         |     |    | ELN    | rs17855988  | c.1741 G>C | p.Gly581Arg  | Het | Missense | Benign |
|         |     |    | COL1A2 | rs42524     | c.1645 C>G | p.Pro549Ala  | Hom | Missense | Benign |
|         |     |    | LAMC1  | rs20563     | c.1372 A>G | p.Ile458Val  | Hom | Missense | Benign |
|         |     |    |        | rs20558     | c.2663 T>C | p. Leu888Pro |     |          |        |
|         |     |    | FN1    | rs1250209   | c.6415 G>A | p.Val2139Ile | Hom | Missense | Benign |
|         |     |    |        | rs2577301   | c.2449 A>C | p.Thr817Pro  |     |          |        |

|             |            |             |            |            |                 |              |     |                  |        |
|-------------|------------|-------------|------------|------------|-----------------|--------------|-----|------------------|--------|
|             |            |             |            | rs1250259  | c.44 A>T        | p.Gln15Leu   | Het |                  |        |
| Case 20     | 79         | 15          | TNC        | rs13321    | c.6022 G>C      | p.Glu2008Gln | Het | Missense         | Benign |
|             |            |             |            | rs61734387 | c.5093 G>C      | p.Arg1698Pro |     |                  |        |
|             |            |             |            | rs2104772  | c.5029 A>T      | p.Ile1677Leu |     |                  |        |
|             |            |             |            | rs1061494  | c.2039 A>G      | p.Gln680Arg  | Hom |                  |        |
|             |            |             |            | rs1757095  | c.1616 A>G      | p.Gln539Arg  | Het |                  |        |
|             |            |             | ICAM1      | rs5498     | c.1405 A>G      | p.Lys469Glu  | Het | Missense         | Benign |
|             |            |             | ROCK2      | rs2230774  | c.1292 C>A      | p.Thr431Asn  | Hom | Missense         | Benign |
|             |            |             | ELN        | rs2071307  | c.1264 G>A      | p.Gly422Ser  | Hom | Missense         | Benign |
|             |            |             |            | rs41511151 | c.2078 G>A      | p.Gly693Asp  | Het |                  |        |
|             |            |             | COL1A2     | -          | c.1015 A>C      | p.Thr339Pro  | Het | Missense         | VUS    |
|             |            |             | LAMC1      | rs20563    | c.1372 A>G      | p.Ile458Val  | Hom | Missense         | Benign |
|             |            |             |            | rs20558    | c.2663 T>C      | p. Leu888Pro |     |                  |        |
|             |            |             | FN1        | rs1250209  | c.6415 G>A      | p.Val2139Ile | Hom | Missense         | Benign |
| rs2577301   | c.2449 A>C | p.Thr817Pro |            |            |                 |              |     |                  |        |
| rs1250259   | c.44 A>T   | p.Gln15Leu  |            | Het        |                 |              |     |                  |        |
| Case 21     | 87         | 14          | TNC        | rs13321    | c.6022 G>C      | p.Glu2008Gln | Het | Missense         | Benign |
|             |            |             |            | rs2104772  | c.5029 A>T      | p.Ile1677Leu |     |                  |        |
|             |            |             |            | rs1757095  | c.1616 A>G      | p.Gln539Arg  |     |                  |        |
|             |            |             | SELE       | rs5366     | c.1261 G>C      | p.Glu421Gln  | Het | Missense         | Benign |
|             |            |             | VCAM1      | rs3783613  | c.1052 G>C      | p.Gly351Ala  | Het | Missense         | Benign |
|             |            |             | ICAM1      | -          | Exon 3 + 1 G>A  | -            | Het | Essential splice | -      |
|             |            |             | ITGB3      | rs15908    | c.1108 A>C      | p.Val370Leu  | Hom | Missense         | -      |
|             |            |             |            | rs73322311 | c.2173 C>T      | p.Ala725Ser  | Het | Missense         | -      |
|             |            |             | LPAR6      | -          | c.227 A>T       | p.Tyr76Phe   | Het | Missense         | VUS    |
|             |            |             | COL1A2     | rs42524    | c.1645 C>G      | p.Pro549Ala  | Hom | Missense         | Benign |
|             |            |             | FN1        | rs1250209  | c.6415 G>A      | p.Val2139Ile | Hom | Missense         | Benign |
|             |            |             |            | rs2577301  | c.2449 A>C      | p.Thr817Pro  |     |                  |        |
|             |            |             |            | rs1250259  | c.44 A>T        | p.Gln15Leu   | Het |                  |        |
| rs115937626 | c.40 G>C   | p.Val14Leu  |            |            |                 |              |     |                  |        |
| Case 22     | 95         | 16          | TNC        | -          | Exon 28 - 2 A>T |              | Het | Essential splice | -      |
|             |            |             |            | rs13321    | c.6022 G>C      | p.Glu2008Gln | Hom | Missense         | Benign |
|             |            |             |            | rs1061494  | c.2039 A>G      | p.Gln680Arg  | Het |                  |        |
|             |            |             |            | rs1757095  | c.1616 A>G      | p.Gln539Arg  | Hom |                  |        |
|             |            |             | VCAM1      | rs3783615  | c.1960 A>T      | p.Ile654Leu  | Het | Missense         | Benign |
| ICAM1       | rs5491     | c.167 A>T   | p.Lys56Met | Het        | Missense        | Benign       |     |                  |        |

|         |    |    |               |            |            |              |            |          |               |
|---------|----|----|---------------|------------|------------|--------------|------------|----------|---------------|
| Case 23 | 86 | 14 | <i>ITGB3</i>  | rs15908    | c.1108 A>C | p.Val370Leu  | <i>Het</i> | Missense | -             |
|         |    |    | <i>LPAR6</i>  | -          | c.227 A>T  | p.Tyr76Phe   | <i>Het</i> | Missense | VUS           |
|         |    |    | <i>COL1A2</i> | -          | c.1015 A>C | p.Thr339Pro  | <i>Het</i> | Missense | VUS           |
|         |    |    |               | rs42524    | c.1645 C>G | p.Pro549Ala  | <i>Hom</i> |          | Benign        |
|         |    |    | <i>LAMC1</i>  | rs20563    | c.1372 A>G | p.Ile458Val  | <i>Het</i> | Missense | Benign        |
|         |    |    |               | rs20558    | c.2663 T>C | p. Leu888Pro |            |          |               |
|         |    |    | <i>CDH1</i>   | rs33935154 | c.1849 G>A | p.Ala617Thr  | <i>Het</i> | Missense | Benign        |
|         |    |    | <i>FN1</i>    | rs1250209  | c.6415 G>A | p.Val2139Ile | <i>Hom</i> | Missense | Benign        |
|         |    |    |               | rs2577301  | c.2449 A>C | p.Thr817Pro  |            |          |               |
|         |    |    |               | rs1250259  | c.44 A>T   | p.Gln15Leu   | <i>Het</i> |          |               |
| Case 23 | 86 | 14 | <i>TNC</i>    | rs13321    | c.6022 G>C | p.Glu2008Gln | <i>Het</i> | Missense | Benign        |
|         |    |    |               | rs2104772  | c.5029 A>T | p.Ile1677Leu |            |          |               |
|         |    |    |               | rs1061494  | c.2039 A>G | p.Gln680Arg  |            |          |               |
|         |    |    |               | rs1757095  | c.1616 A>G | p.Gln539Arg  | <i>Hom</i> |          |               |
|         |    |    | <i>ICAM1</i>  | rs5498     | c.1405 A>G | p.Lys469Glu  | <i>Het</i> | Missense | Benign        |
|         |    |    | <i>ITGB1</i>  | -          | c.1807 A>T | p.Asn603Tyr  | <i>Het</i> | Missense | VUS           |
|         |    |    | <i>LPAR6</i>  | -          | c.227 A>T  | p.Tyr76Phe   | <i>Het</i> | Missense | VUS           |
|         |    |    | <i>ELN</i>    | -          | c.1435 G>A | p.Val479Met  | <i>Het</i> | Missense | Likely Benign |
|         |    |    | <i>COL1A2</i> | rs42524    | c.1645 C>G | p.Pro549Ala  | <i>Hom</i> | Missense | Benign        |
|         |    |    | <i>LAMC1</i>  | rs20563    | c.1372 A>G | p.Ile458Val  | <i>Hom</i> | Missense | Benign        |
|         |    |    |               | rs20558    | c.2663 T>C | p. Leu888Pro |            |          |               |
|         |    |    | <i>FN1</i>    | rs1250209  | c.6415 G>A | p.Val2139Ile | <i>Hom</i> | Missense | Benign        |
|         |    |    |               | rs2577301  | c.2449 A>C | p.Thr817Pro  |            |          |               |
|         |    |    |               | rs1250259  | c.44 A>T   | p.Gln15Leu   |            |          |               |

Hom, homozygous; Het, heterozygous; VUS, Variant of Uncertain Significance



Tabla S4. Frequency of variants annotated found in our study

| Gene          | ID          | Nucleotide change | Frequency in study patients (n=23) | Frequency in study control group (n=16) | Frequency in European population (dbSNP, 1000Genomes) |
|---------------|-------------|-------------------|------------------------------------|-----------------------------------------|-------------------------------------------------------|
| <i>CDH1</i>   | rs33935154  | c.1849 G>A        | (1) 0.0435                         | 0                                       | 0.0010                                                |
| <i>COL1A2</i> | rs42524     | c.1645 C>G        | (20) 0.8696                        | (12) 0.75                               | 0.7604                                                |
| <i>ELN</i>    | rs2071307   | c.1264 G>A        | (12) 0.5217                        | (7) 0.4375                              | 0.4205                                                |
|               | rs17855988  | c.1741 G>C        | (8) 0.3478                         | (1) 0.0625                              | 0.0915                                                |
|               | rs41511151  | c.2078 G>A        | (2) 0.0869                         | 0                                       | 0.0119                                                |
| <i>FN1</i>    | rs115937626 | c.40 G>C          | (1) 0.0435                         | 0                                       | 0.0000                                                |
|               | rs1250209   | c.6415 G>A        | (23) 1                             | (16) 1                                  | 1                                                     |
|               | rs2577301   | c.2449 A>C        | (23) 1                             | (11) 0.6875                             | 1                                                     |
|               | rs1250259   | c.44 A>T          | (21) 0.9130                        | (14) 0.875                              | 0.7674                                                |
| <i>ICAM1</i>  | rs5491      | c.167 A>T         | (1) 0.0435                         | 0                                       | 0.0070                                                |
|               | rs5498      | c.1405 A>G        | (15) 0.6522                        | (13) 0.8125                             | 0.4662                                                |
|               | rs1799969   | c.721 G>A         | (1) 0.0435                         | 0                                       | 0.1213                                                |
|               | rs1801714   | c.1055 C>T        | (2) 0.0869                         | (3) 0.1875                              | 0.0219                                                |
|               | rs376526495 | c.1589 C>T        | (1) 0.0435                         | 0                                       | 0.0000                                                |
| <i>ITGB3</i>  | rs5918      | c.176 T>C         | (5) 0.2174                         | (6) 0.375                               | 0.1322                                                |
|               | rs15908     | c.1108 A>C        | (18) 0.7826                        | (10) 0.625                              | 0.3678                                                |
|               | rs121918449 | c.1199 G>A        | (2) 0.0869                         | 0                                       | 0.000                                                 |
|               | rs73322311  | c.2173 C>T        | (1) 0.0435                         | 0                                       | 0.0000                                                |
|               | rs367659742 | c.2351 C>T        | (1) 0.0435                         | 0                                       | 0.0010                                                |
| <i>LAMC1</i>  | rs20563     | c.1372 A>G        | (19) 0.8261                        | (2) 0.125                               | 0.5636                                                |
|               | rs148690613 | c.2053 A>G        | (1) 0.0435                         | 0                                       | 0.0010                                                |
|               | rs20558     | c.2663 T>C        | (19) 0.8261                        | (11) 0.6875                             | 0.5636                                                |
|               | rs61749262  | c.3614 A>G        | (2) 0.0869                         | 0                                       | 0.0159                                                |
|               | rs34995260  | c.3796 G>A        | (1) 0.0435                         | 0                                       | 0.0060                                                |
| <i>LPAR4</i>  | rs148919808 | c.133 G>A         | (1) 0.0435                         | 0                                       | 0.007                                                 |
| <i>ROCK2</i>  | rs2230774   | c.1292 C>A        | (14) 0.6087                        | (10) 0.625                              | 0.5268                                                |
| <i>SELE</i>   | rs5368      | c.1402 C>T        | (4) 0.1739                         | (1) 0.0625                              | 0.1262                                                |
|               | rs5366      | c.1261 G>C        | (1) 0.0435                         | 0                                       | 0.0000                                                |
|               | rs5361      | c.445 A>C         | (4) 0.1739                         | (3) 0.1875                              | 0.0984                                                |
| <i>TNC</i>    | rs13321     | c.6022 G>C        | (22) 0.9565                        | (14) 0.875                              | 0.7207                                                |
|               | rs2274750   | c.5341 G>A        | (1) 0.0435                         | 0                                       | 0.0318                                                |
|               | rs61734387  | c.5093 G>C        | (2) 0.0869                         | (1) 0.0625                              | 0.0129                                                |
|               | rs2104772   | c.5029 A>T        | (13) 0.5652                        | (11) 0.6875                             | 0.4503                                                |
|               | rs113301777 | c.3739 C>A        | (4) 0.1739                         | (1) 0.0625                              | 0.0179                                                |
|               | rs1138545   | c.3197 G>A        | (4) 0.1739                         | (1) 0.0625                              | 0.1501                                                |
|               | rs1061494   | c.2039 A>G        | (17) 0.7391                        | (16) 1                                  | 0.4423                                                |
|               | rs1757095   | c.1616 A>G        | (23) 1                             | (16) 1                                  | 0.9404                                                |
| <i>VCAM1</i>  | rs3783613   | c.1052 G>C        | (1) 0.0435                         | 0                                       | 0.0000                                                |
|               | rs3783615   | c.1960 A>T        | (1) 0.0435                         | 0                                       | 0.0000                                                |

## References

1. Bierzynska A, Soderquest K, Dean P, et al. MAGI2 mutations cause congenital nephrotic syndrome. *J Am Soc Nephrol*. **2017**;28(5):1614-1621. doi:10.1681/ASN.2016040387
2. Assad L, Schwartz MM, Virtanen I, Gould VE. Immunolocalization of tenascin and cellular fibronectins in diverse glomerulopathies. *Virchows Arch B Cell Pathol Incl Mol Pathol*. **1993**;63(1):307-316. doi:10.1007/BF02899277
3. Maxwell PH, Wang Y. Genetic studies of IgA nephropathy. *Nephron - Exp Nephrol*. **2006**;102(3-4):76-80. doi:10.1159/000089685
4. Adler S, Brady HR. Cell adhesion molecules and the glomerulopathies. *Am J Med*. **1999**;107(4):371-386. doi:10.1016/S0002-9343(99)00233-8
